# Supplementary material
Source: PubMed Central journal article supplement (PMC5940519)

# Supplementary Figure 1

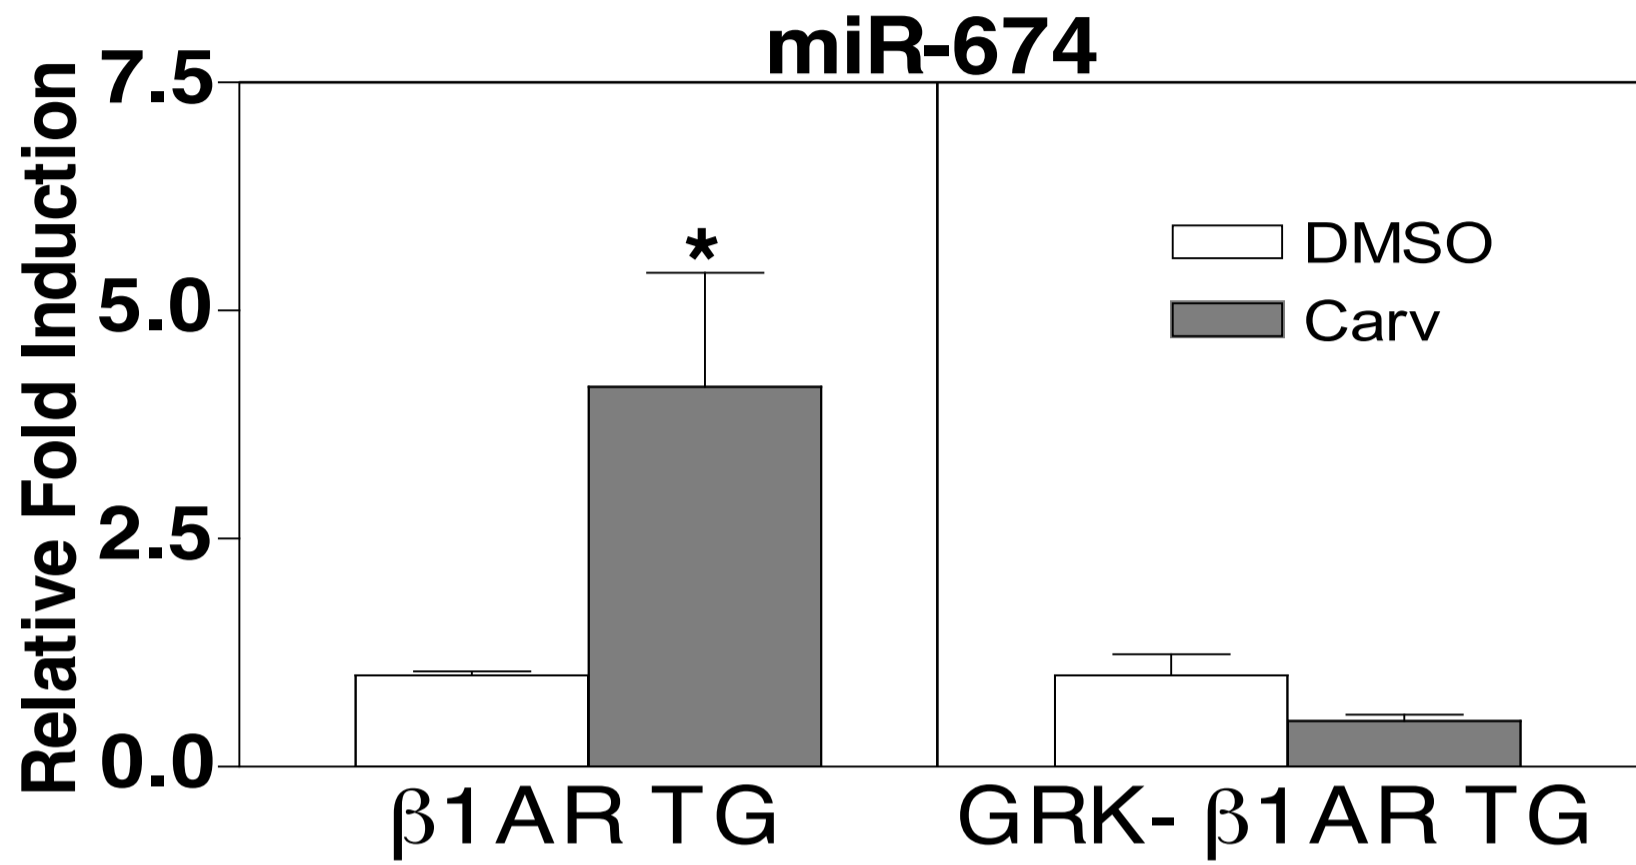

# Supplementary Figure 2

## A mature miRs

|                 |   |                        |    |
|-----------------|---|------------------------|----|
| rno-miR-466b-3p | 1 | auacauacacacac-acacaca | 21 |
| mmu-miR-466g    | 1 | auacagacacaugc-acacaca | 21 |
| hsa-miR-466     | 1 | auacacauacacgcaacacaca | 22 |
| rno-miR-532-5p  | 1 | caugccuugaguguaggacugu | 22 |
| mmu-miR-532-5p  | 1 | caugccuugaguguaggaccgu | 22 |
| hsa-miR-532-5p  | 1 | caugccuugaguguaggaccgu | 22 |
| rno-miR-674-5p  | 1 | gcacugagaugggaguggugua | 22 |
| mmu-miR-674-5p  | 1 | gcacugagaugggaguggugua | 22 |
| hsa-miR-674     | 1 | gcacugagaugggaguggugua | 22 |

## B premature miRs

|                |   |                                                                                                     |     |
|----------------|---|-----------------------------------------------------------------------------------------------------|-----|
| rno-miR-466b-1 | 1 | cauguguauauauguguguguguauuguccauguguguauaugaauauacauacacacac-acauacacacacgugcaagcacacaca            | 86  |
| mmu-miR-466g   | 1 | uguguuuucgugugugugcauguggauguauaugauuuugcauauacagacacaugc-acacacaugcggcacacac                       | 80  |
| hsa-miR-466    | 1 | guguguguauauguguguugcauguguguauauguguguauauauguacacauacacauacacgcaacacacauauaucaugc                 | 84  |
| rno-miR-532    | 1 | cgacuugcuuuucucccaugccuugaguguaggaccguugcaucuuauuuaccuccccacacccaagguugcagaagagcgagccu              | 91  |
| mmu-miR-532    | 1 | cagauugcuuuuuucucuccaugccuugaguguaggaccguugacauuuuuuuaccuccccacacccaagguugcaggagagcaagccuucuc       | 96  |
| hsa-miR-532    | 1 | uuuuucucuccaugccuugaguguaggacugugacauuuuuuuaccuccccacacccaagguugcaggagagcaag                        | 79  |
| rno-miR-674    | 1 | ggccuagucacaccucgagccuugcacugagaugggagugguguaaggcucagguaugcacagcucccaucucagaacaaggcucgggugugcucagcu | 100 |
| mmu-miR-674    | 1 | ggccuagucacaccucgagccuugcacugagaugggagugguguaaggcucagguaugcacagcucccaucucagaacaaggcucgggugugcucagcu | 100 |
| hsa-miR-674    | 1 | ccugagccuugcacugagaugggagugguguaaggcucagguaugcacagcucccaucucagaacaaggcucgggug                       | 77  |

# Supplementray Figure 3

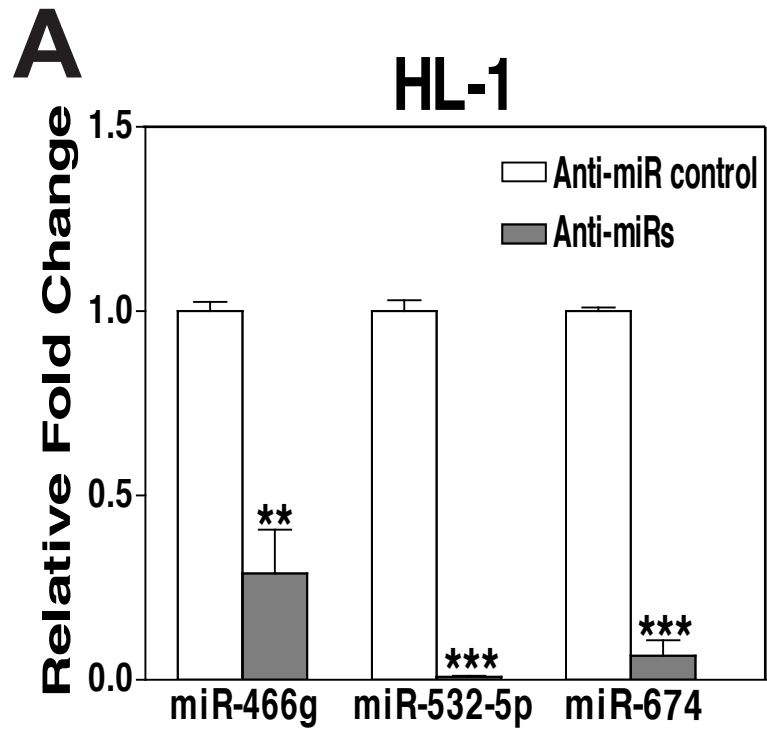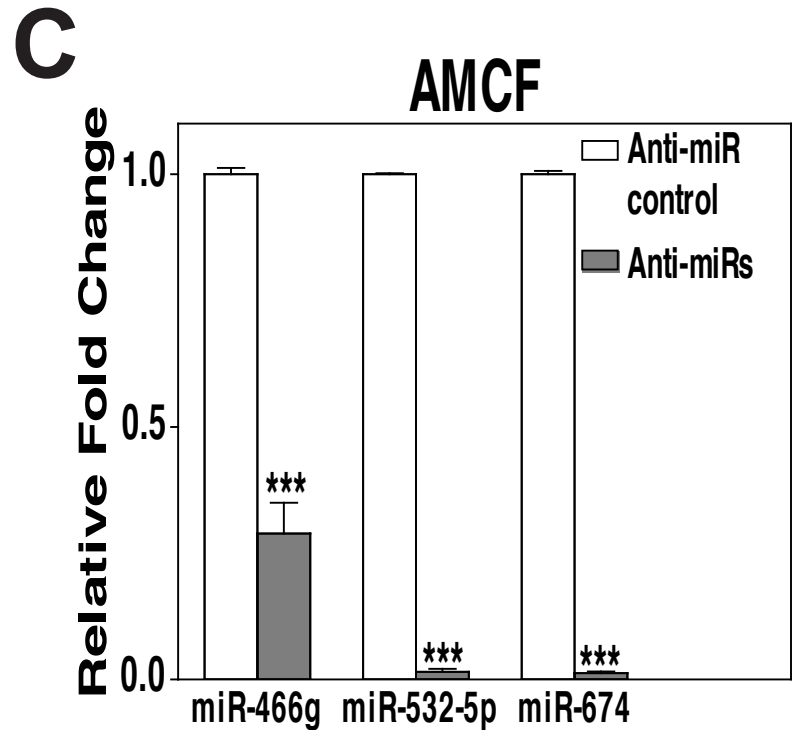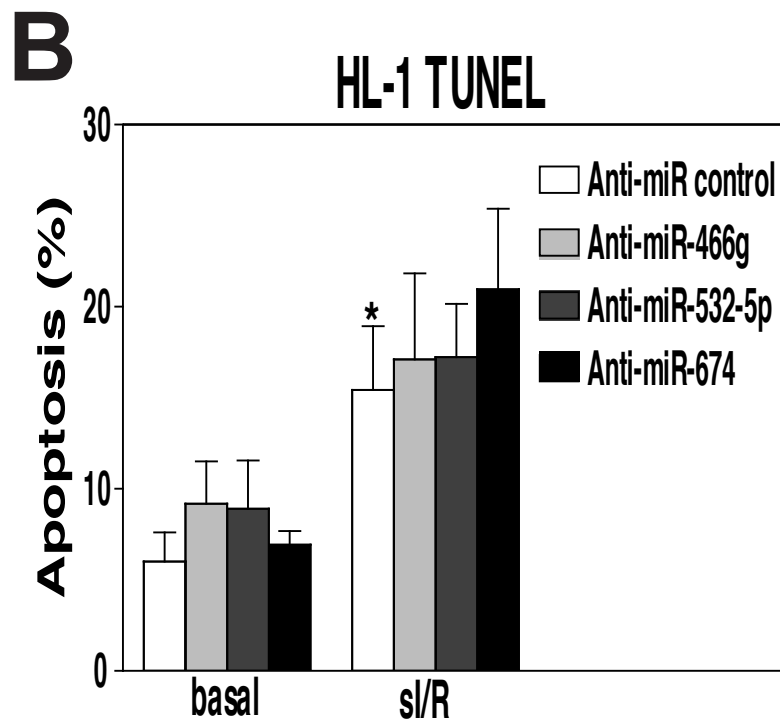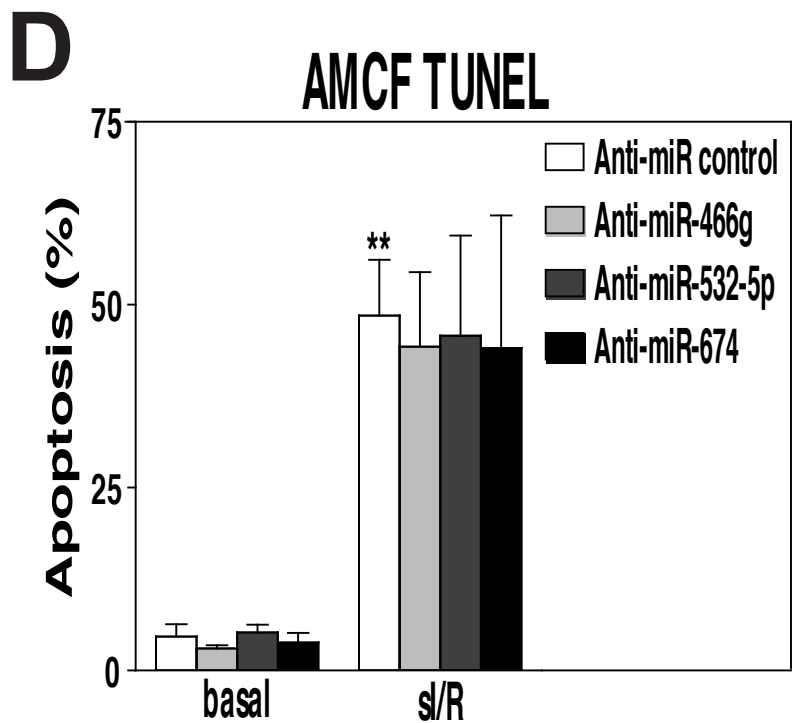

# Supplementary Figure 4

**A**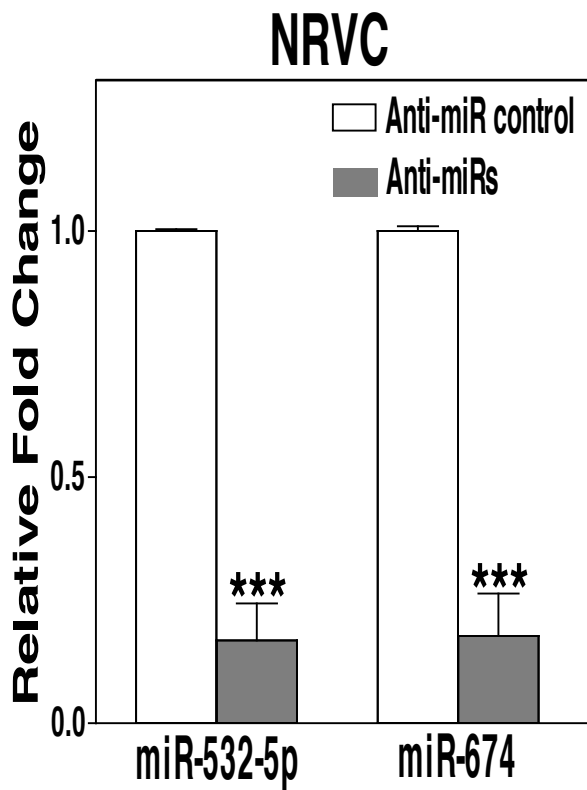**C**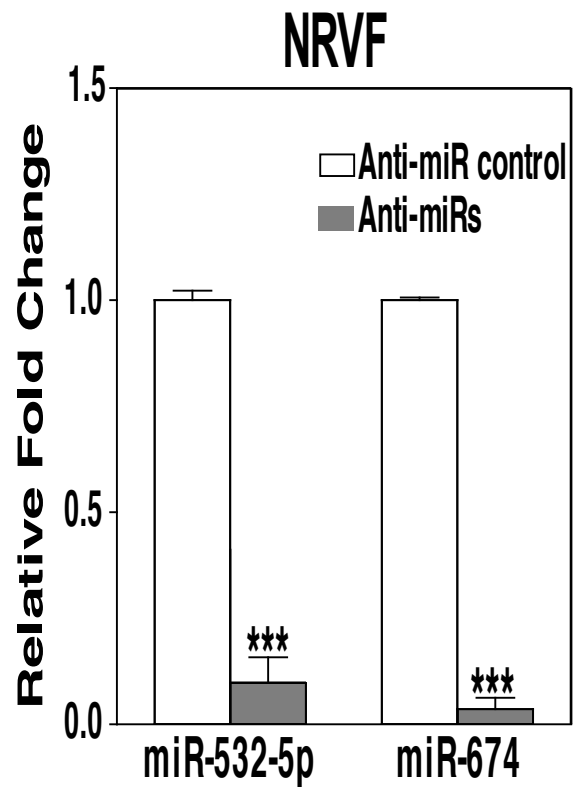**B**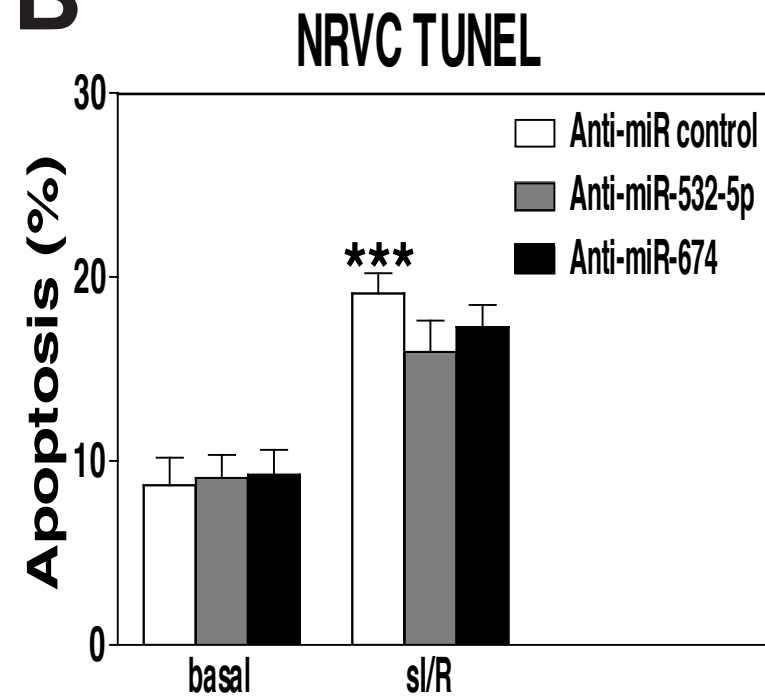**D**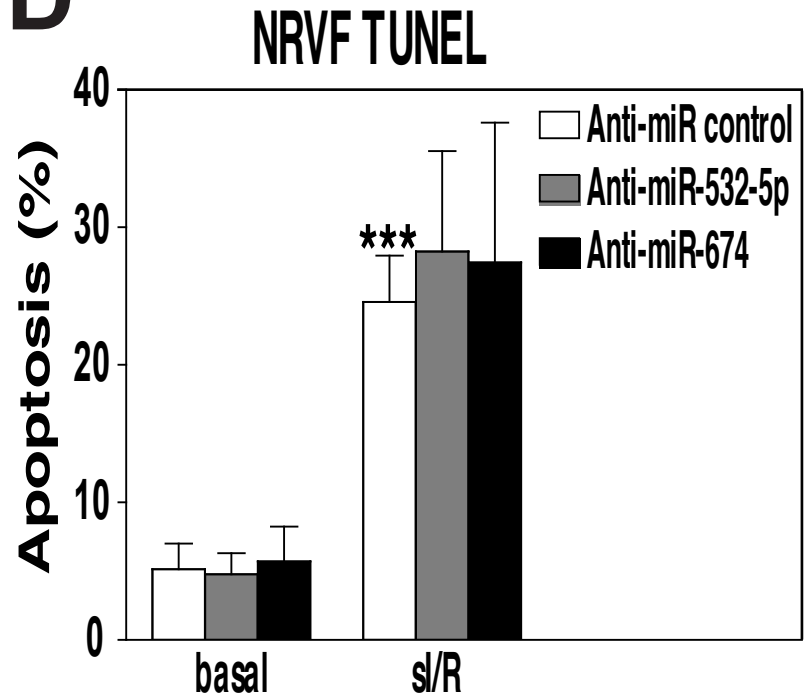

# Supplementary Figure 5

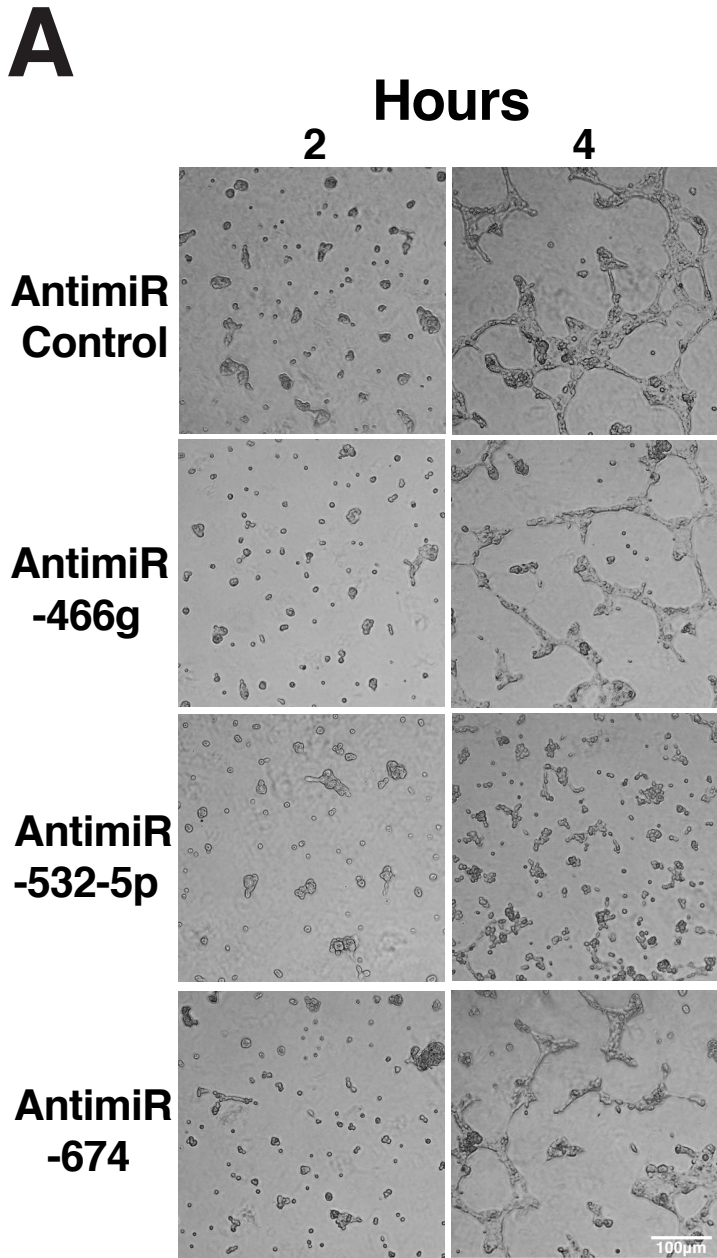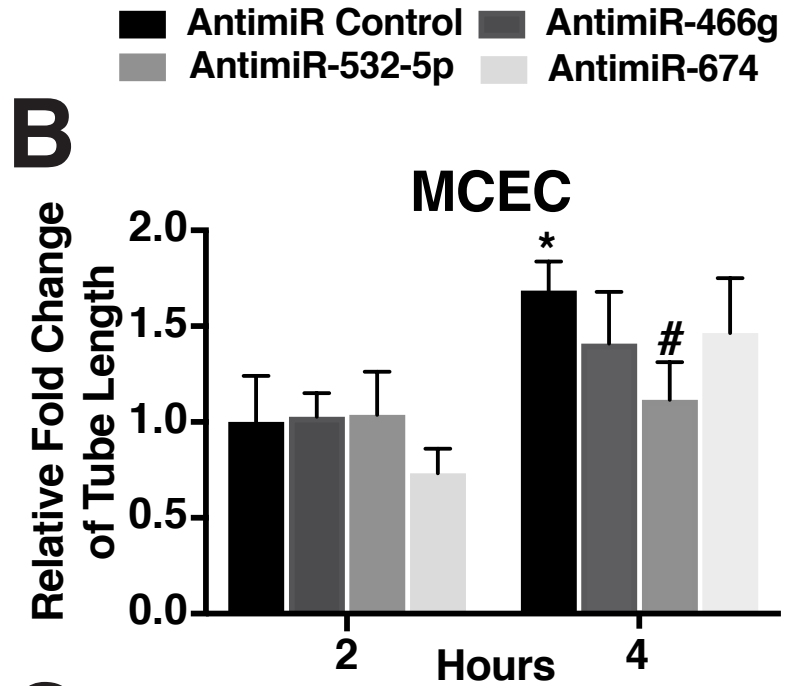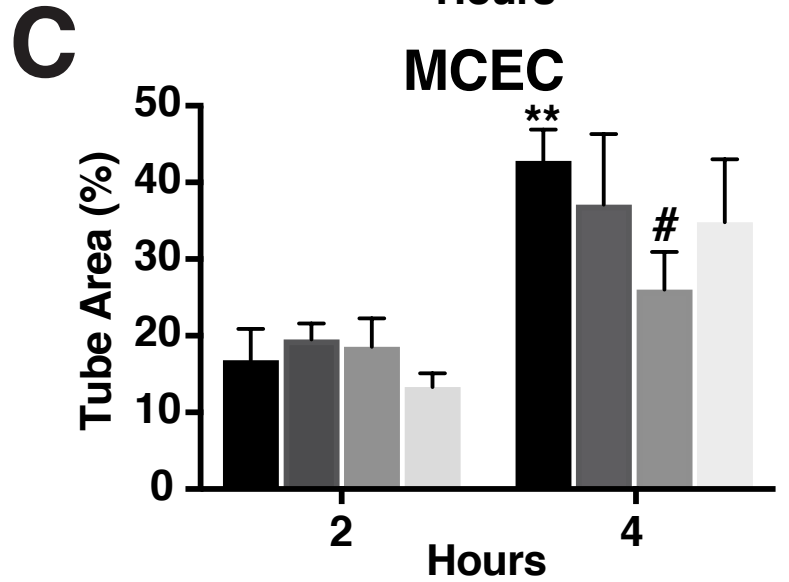

# Supplementary Figure 6

## MCEC

■ antimiR control      ■ antimiR-466g

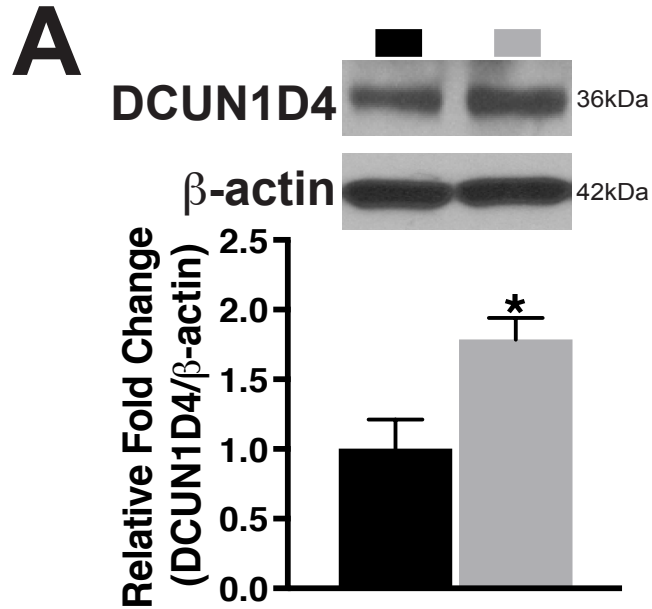

■ miR mimic control      ■ miR-466g mimic

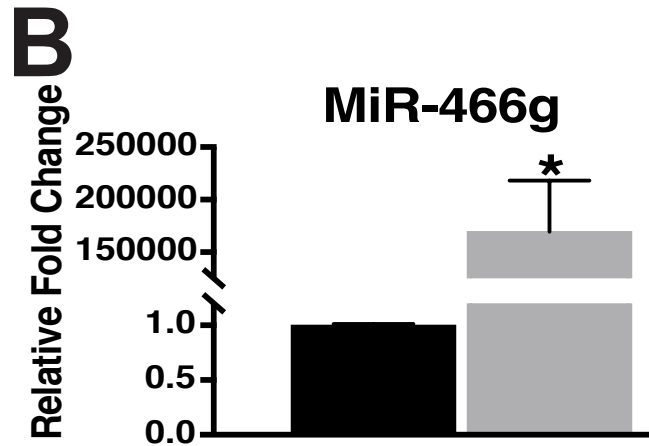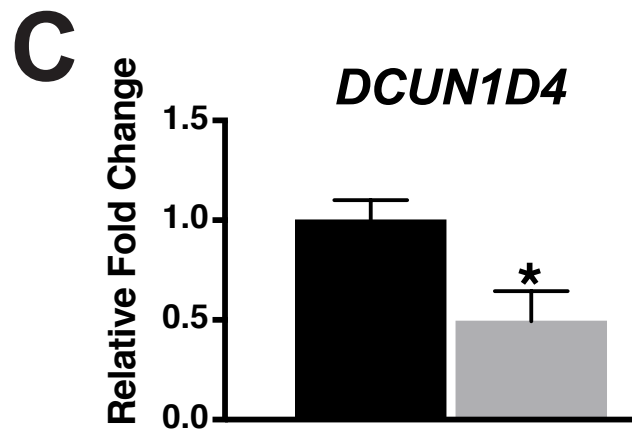

# Supplementary Figure 7

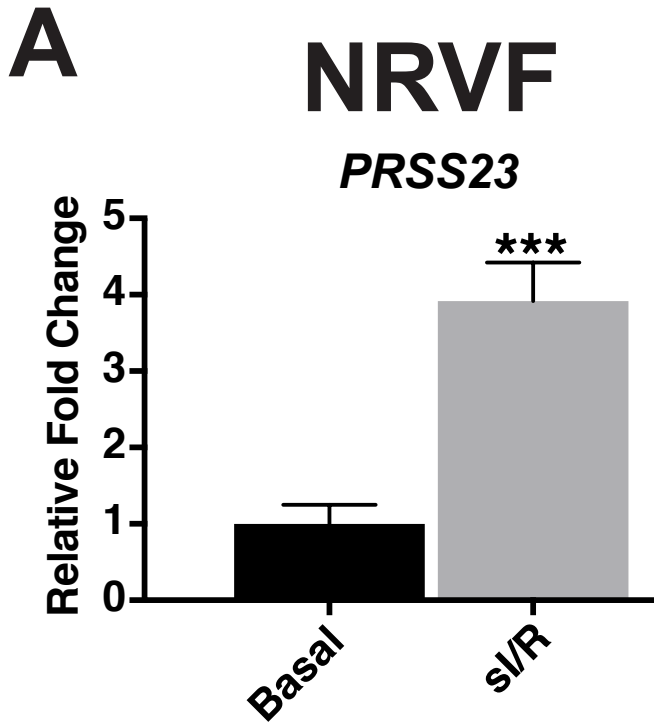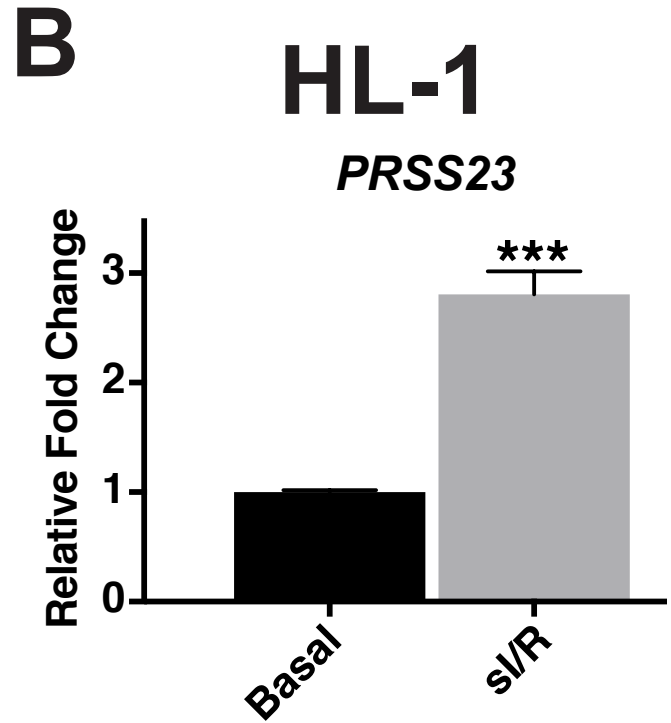

# Supplementary Figure 8

## NRVF

■ miR mimic control    ■ miR-674 mimic

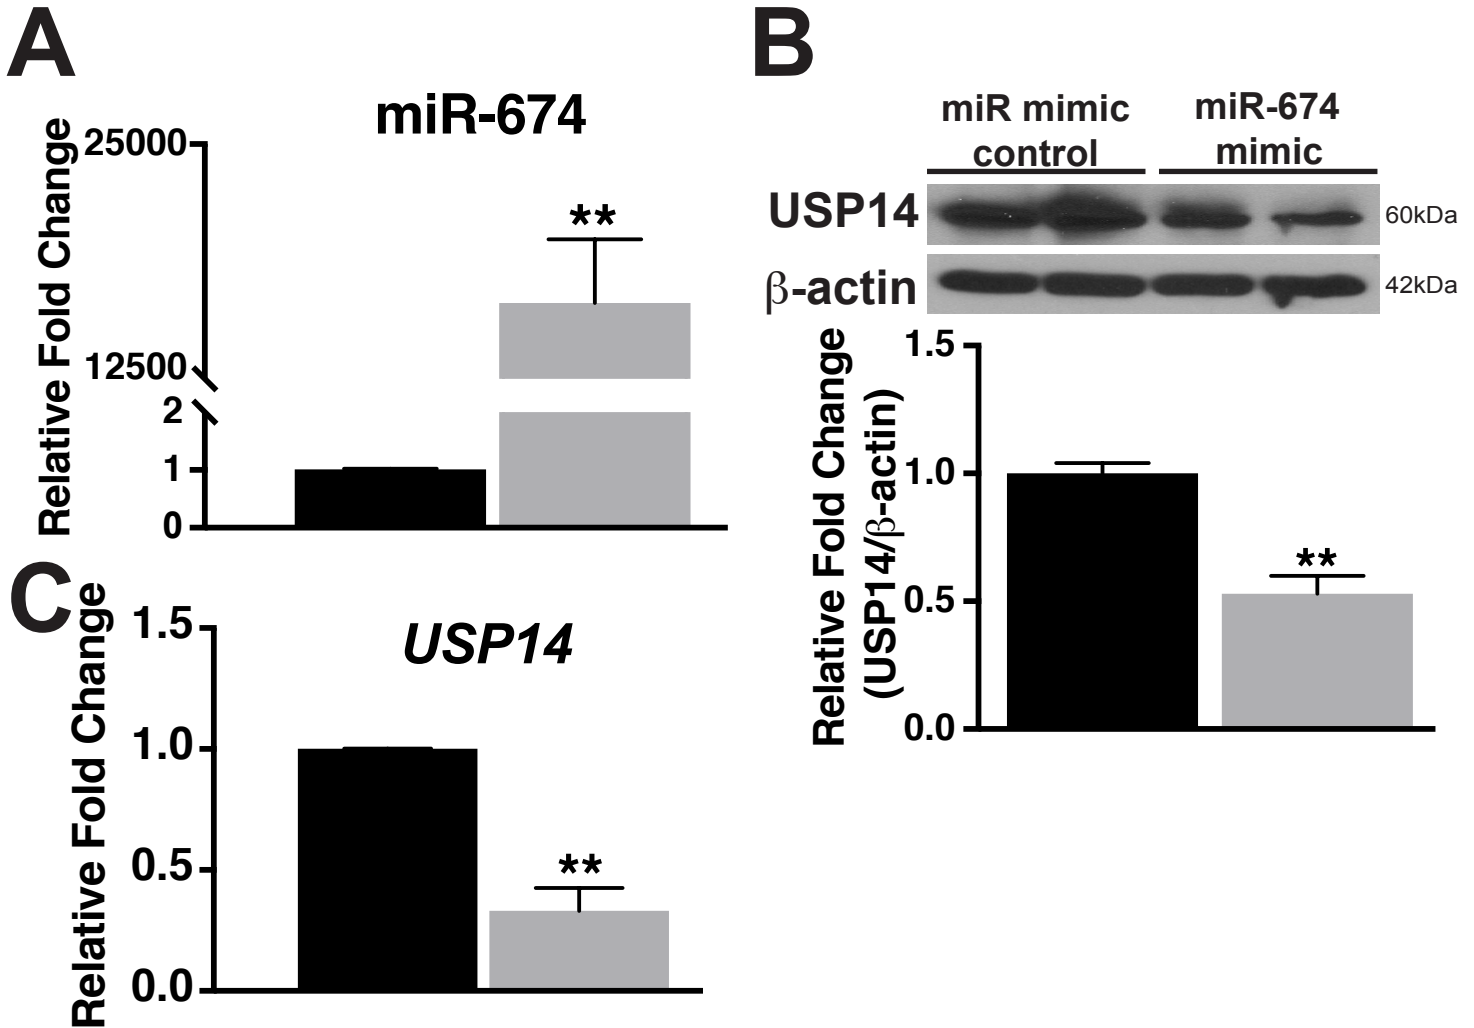

Supplement: NIHMS960114-supplement-2.pdf [file NIHMS960114-supplement-2.pdf]
